1 **Association Between SARS-CoV-2 RNAemia and Post-Acute Sequelae of COVID-19.**

2  
3 Nikhil Ram-Mohan PhD<sup>1</sup>, David Kim MD PhD<sup>1</sup>, Angela J Rogers MD MPH<sup>2</sup>, Catherine A Blish  
4 MD PhD<sup>3</sup>, Kari C Nadeau MD PhD<sup>2</sup>, Andra L Blomkalns MD<sup>1</sup>, Samuel Yang MD<sup>1\*</sup>

5  
6 <sup>1</sup>Department of Emergency Medicine, Stanford University School of Medicine, Palo Alto CA 94305 USA

7 <sup>2</sup>Department of Medicine - Pulmonary, Allergy & Critical Care Medicine, Stanford University School of Medicine,  
8 Palo Alto CA 94305 USA

9 <sup>3</sup>Department of Medicine/Infectious Diseases, Stanford University School of Medicine, Palo Alto CA 94305 USA

10  
11  
12 \* Correspondence to:

13  
14 Samuel Yang MD, FACEP  
15 300 Pasteur Dr. Rm M121,  
16 Alway Bldg MC 5119,  
17 Stanford CA 94305  
18 [syang5@stanford.edu](mailto:syang5@stanford.edu)  
19 (650) 725-9492  
20

21  
22  
23 **Funding**

24  
25 This work was supported by NIH/NIAID (Grants R01AI153133, R01AI137272, and  
26 3U19AI057229 – 17W1 COVID SUPP #2) and a donation from Eva Grove.  
27  
28  
29  
30  
31  
32  
33  
34  
35  
36

37 **Abstract**

38

39 Determinants of Post-Acute Sequelae of COVID-19 are not known. Here we show that 75% of  
40 patients with viral RNA in blood (RNAemia) at presentation were symptomatic in the post-acute  
41 phase. RNAemia at presentation successfully predicted PASC, independent of patient  
42 demographics, initial disease severity, and length of symptoms.

43

44 **Keywords**

45

46 **SARS-CoV-2, RNAemia, PASC, long COVID**

47

48

49

50

51

52

53

54

55

56

57

58

59

## 60 **Background**

61

62 The determinants of COVID-19 severity and extrapulmonary complications have now been well  
63 studied, and RNAemia (viral RNA in blood) has emerged as an important factor (1,2). Much less  
64 is known about the determinants of Post-Acute Sequelae of COVID-19 (PASC), the persistence  
65 or development of new symptoms after the acute phase of infection, recently reported to affect as  
66 many as 87.4% of COVID-19 patients (3,4) primarily with moderate or worse severity (5,6).  
67 Recent evidence suggested persistent clotting protein pathology with elevated levels of  
68 antiplasmin (7) and non-classical monocytes (8) in patients with PASC. Discovery of SARS-  
69 CoV-2 S1 protein in these non-classical monocytes and fragmented SARS-CoV-2 RNA in  
70 peripheral blood mononuclear cells in a PASC patient 15 months post infection further exhibited  
71 the persistence of viral particles (8). Given the importance of RNAemia in disease severity and  
72 its persistence in the blood, we describe the relationship between RNAemia at presentation and  
73 post-acute symptoms at least three weeks after symptom onset.

74

## 75 **Methods**

76

77 We studied the clinical trajectories of 155 patients enrolled in the IRB-approved (eP-55650)  
78 Stanford Hospital Emergency Department (ED) COVID-19 Biobank between April and  
79 November 2020 with completed follow-ups. We assessed symptoms and severity (based on a  
80 modified WHO scale) (1) on the date of enrollment (median = 4, range = 0 – 44 days after  
81 symptom onset), and at least three weeks after symptom onset (median = 35, range = 21 – 79  
82 days).

83

84 We measured SARS-CoV-2 RNAemia at the time of enrollment, using the definitions of our  
85 earlier study (1). We compared the proportions of initially RNAemic and non-RNAemic patients  
86 with persistent or new symptoms in the post-acute phase using a 2-sample chi-squared test with  
87 continuity correction. We estimated the association between RNAemia at enrollment and PASC  
88 at follow-up in a logistic model controlling for disease severity at enrollment, patient  
89 demographics (age and gender), presence of any symptom at enrollment (anxiety, dizziness,  
90 fatigue, hair loss, palpitations, rash, insomnia, chest pain, chills, cough, decrease in sense of  
91 taste, fever, nausea/vomiting/diarrhea, headache, loss of smell, myalgia, new confusion,  
92 shortness of breath), and durations of symptoms. We also compared the median number of PASC  
93 symptoms for RNAemic and non-RNAemic patients using the Wilcoxon rank-sum test with  
94 continuity correction. We performed all analyses in R (version 4.0.3).

95

## 96 **Results**

97

98 49.0% (76/155) of patients were women, and the median age was 45 years (IQR 34 – 60). At  
99 enrollment, 27.1% (42/155) of patients had mild disease severity, 67.7% (105/155) moderate,  
100 and 5.2% (8/155) severe. Patients had a median of six symptoms (IQR = 4–8): 72.3% (112/155)  
101 had a cough, 65.3% (101/155) had shortness of breath, and 64.5% (99/155) had fever. In the  
102 post-acute phase, 52.3% (81/155) had one or more new (24.5% [38/155]) or persistent (37.4%  
103 [58/155]) symptoms, of which the most common were cough, dizziness, and loss of smell (Table  
104 1). 1.3% (2/155) of patients developed anxiety that was not present at enrollment.

105

106 75.0% (27/36) of initially RNAemic patients were symptomatic in the post-acute phase,  
107 compared to 43.7% (52/119) of non-RNAemic patients (difference = 31.3% [95% CI, 12.8% -  
108 49.8%],  $p=0.002$ ). RNAemic patients had a median of one symptom in the post-acute phase  
109 compared to zero in non-RNAemic patients ( $p=0.014$ , Wilcoxon rank-sum test). RNAemia at  
110 presentation predicted PASC, conditional on patient demographics and initial disease severity  
111 (OR 1.31 [95% CI, 1.08 – 1.59],  $p=0.007$  (Supplement)). The association was strongest for  
112 patients with moderate disease severity at presentation (Figure), with 78.6% (22/28) of initially  
113 RNAemic patients symptomatic in the post-acute phase, compared to 45.5% (35/77) of non-  
114 RNAemic patients (difference = 33.1% [95% CI, 11.8% - 54.4%],  $p=0.005$ ). This difference was  
115 due almost entirely to persistent or new respiratory symptoms (difference in proportions = 28.2%  
116 [95% CI, 8.4% - 47.9%],  $p=0.002$ ).

117

## 118 **Discussion**

119

120 To our knowledge, this study describes the first reported association between SARS-CoV-2  
121 RNAemia and PASC. RNAemia at presentation was associated with new or persistent symptoms  
122 at least 21 days after symptom onset independent of initial patient severity and the association  
123 was strongest among patients with moderately severe clinical presentations requiring hospital  
124 admission. This finding adds to the growing literature on SARS-CoV-2 RNAemia's role in  
125 disease severity and extrapulmonary complications in the acute phase of illness, as well as the  
126 association between hospitalization and PASC (1,2,5,6). The incidence of PASC was lower in  
127 this single-center study than in reports from Italy and the UK (3,4), but similar to that reported in  
128 a recent study from the US (9). The potential contributions of patient characteristics, study

129 methodologies, and viral variants to these discrepancies merit further study. Though the  
130 mechanisms underlying RNAemia's contributions to multi-system pathology in both the acute  
131 and post-acute phases, when persistent, remain to be elucidated, mounting evidence for its  
132 predictive value suggests that testing for SARS-CoV-2 RNAemia at presentation may help guide  
133 the triage, management, and prognosis of COVID-19.

134  
135 **Acknowledgements:** The authors would like to thank the additional author members of the  
136 Stanford COVID-19 Biobank Study Group include: Elizabeth J Zudock, Marjan M Hashemi,  
137 Kristel C Tjandra, Jennifer A Newberry, James V Quinn, Ruth O'Hara, Euan Ashley, Rosen  
138 Mann, Anita Visweswaran, Thanmayi Ranganath, Jonasel Roque, Monali Manohar, Hena Naz  
139 Din, Komal Kumar, Kathryn Jee, Brigit Noon, Jill Anderson, Bethany Fay, Donald Schreiber,  
140 Nancy Zhao, Rosemary Vergara, Julia McKechnie, Aaron Wilk, Lauren de la Parte, Kathleen  
141 Whittle Dantzler, Maureen Ty, Nimish Kathale, Arjun Rustagi, Giovanni Martinez-Colon, Geoff  
142 Ivison, Ruoxi Pi, Maddie Lee, Rachel Brewer, Taylor Hollis, Andrea Baird, Michele Ugur, Drina  
143 Bogusch, Georgie Nahass, Kazim Haider, Kim Quyen Thi Tran, Laura Simpson, Michal Tal, Iris  
144 Chang, Evan Do, Andrea Fernandes, Allie Lee, Neera Ahuja, Theo Snow, James Krempski. We  
145 would also like to thank Hien Nguyen, Lingxia Jiang, and Paul Hung from COMBiNATi Inc. for  
146 all the material and technical support.

147  
148 **Disclosures:** Yang is a Scientific Advisory Board member of COMBiNATi Inc.

149  
150 **References**

- 151 1. Ram-Mohan N, Kim D, Zudock EJ, Hashemi MM, Tjandra KC, Rogers AJ, et al. SARS-  
152 CoV-2 RNAemia predicts clinical deterioration and extrapulmonary complications from  
153 COVID-19. *Clinical Infectious Diseases*. 2021 May 5;ciab394.
- 154 2. The Massachusetts Consortium for Pathogen Readiness, Fajnzylber J, Regan J, Coxen K,  
155 Corry H, Wong C, et al. SARS-CoV-2 viral load is associated with increased disease severity  
156 and mortality. *Nat Commun*. 2020 Dec;11(1):5493.
- 157 3. Carfi A, Bernabei R, Landi F, for the Gemelli Against COVID-19 Post-Acute Care Study  
158 Group. Persistent Symptoms in Patients After Acute COVID-19. *JAMA*. 2020 Aug  
159 11;324(6):603.
- 160 4. Arnold DT, Hamilton FW, Milne A, Morley AJ, Viner J, Attwood M, et al. Patient outcomes  
161 after hospitalisation with COVID-19 and implications for follow-up: results from a  
162 prospective UK cohort. *Thorax*. 2021 Apr;76(4):399–401.

- 163 5. Lund LC, Hallas J, Nielsen H, Koch A, Mogensen SH, Brun NC, et al. Post-acute effects of  
164 SARS-CoV-2 infection in individuals not requiring hospital admission: a Danish population-  
165 based cohort study. *The Lancet Infectious Diseases*. 2021 May;S1473309921002115.
- 166 6. Hirschtick JL, Titus AR, Slocum E, Power LE, Hirschtick RE, Elliott MR, et al. Population-  
167 based estimates of post-acute sequelae of SARS-CoV-2 infection (PASC) prevalence and  
168 characteristics. *Clinical Infectious Diseases*. 2021 May 19;ciab408.
- 169 7. Pretorius E, Vlok M, Venter C, Bezuidenhout JA, Laubscher GJ, Steenkamp J, et al.  
170 Persistent clotting protein pathology in Long COVID/ Post-Acute Sequelae of COVID-19  
171 (PASC) is accompanied by increased levels of antiplasmin [Internet]. *Infectious Diseases*  
172 (except HIV/AIDS); 2021 May [cited 2021 Aug 30]. Available from:  
173 <http://medrxiv.org/lookup/doi/10.1101/2021.05.21.21257578>
- 174 8. Patterson BK, Francisco EB, Yogendra R, Long E, Pise A, Rodrigues H, et al. Persistence of  
175 SARS CoV-2 S1 Protein in CD16+ Monocytes in Post-Acute Sequelae of COVID-19  
176 (PASC) Up to 15 Months Post-Infection [Internet]. *Immunology*; 2021 Jun [cited 2021 Aug  
177 28]. Available from: <http://biorxiv.org/lookup/doi/10.1101/2021.06.25.449905>
- 178 9. Chopra V, Flanders SA, O'Malley M, Malani AN, Prescott HC. Sixty-Day Outcomes  
179 Among Patients Hospitalized With COVID-19. *Ann Intern Med*. 2020 Nov 11;M20-5661.

180

181

182

183

184

185

186 **Tables and Figures**  
187 **Table: Progression of COVID-19 symptoms**

| Symptom                  | On enrollment   | Persistent at follow-up | New at follow-up |
|--------------------------|-----------------|-------------------------|------------------|
| <b>Cardiovascular</b>    |                 |                         |                  |
| Chest Pain               | 34.2% (53/155)  | 11.3% (6/53)            | 0.7% (1/149)     |
| Palpitations             | 0.6% (1/155)    | 0 (0)                   | 1.3% (2/155)     |
| <b>Dermatologic</b>      |                 |                         |                  |
| Rash                     | 1.3% (2/155)    | 0 (0)                   | 0.6% (1/155)     |
| Hair Loss                | 0 (0)           | 0 (0)                   | 0.6% (1/155)     |
| <b>Gastrointestinal</b>  |                 |                         |                  |
| Nausea/vomiting/diarrhea | 43.8% (68/155)  | 7.3% (5/68)             | 0.7% (1/150)     |
| <b>Constitutional</b>    |                 |                         |                  |
| Fever                    | 64.5% (100/155) | 1.0% (1/100)            | 0 (0)            |
| Chills                   | 32.9% (51/155)  | 3.9% (2/51)             | 0.6% (1/153)     |
| Myalgia                  | 41.2% (64/155)  | 15.6% (10/64)           | 4.1% (6/145)     |
| Fatigue                  | 36.7% (57/155)  | 14.0% (8/57)            | 8.2% (12/147)    |
| <b>Neuropsychiatric</b>  |                 |                         |                  |
| Loss of Taste            | 41.2% (64/155)  | 14.0% (9/64)            | 0 (0)            |
| Loss of Smell            | 29.6% (46/155)  | 19.5% (9/46)            | 0 (0)            |
| Confusion                | 2.5% (4/155)    | 0 (0)                   | 2.6% (4/155)     |
| Headache                 | 22.5% (35/155)  | 2.8% (1/35)             | 5.2% (8/154)     |
| Dizziness                | 5.8% (9/155)    | 22.2% (2/9)             | 2.6% (4/153)     |
| Insomnia                 | 0.6% (1/155)    | 0 (0)                   | 0.6% (1/155)     |
| Anxiety                  | 0 (0)           | 0 (0)                   | 1.3% (2/155)     |
| <b>Respiratory</b>       |                 |                         |                  |
| Cough                    | 72.2% (112/155) | 25.8% (29/112)          | 3.9% (5/126)     |
| Shortness of breath      | 65.1% (101/155) | 18.8% (19/101)          | 3.7% (5/136)     |

188

189

190



191 **Figure**

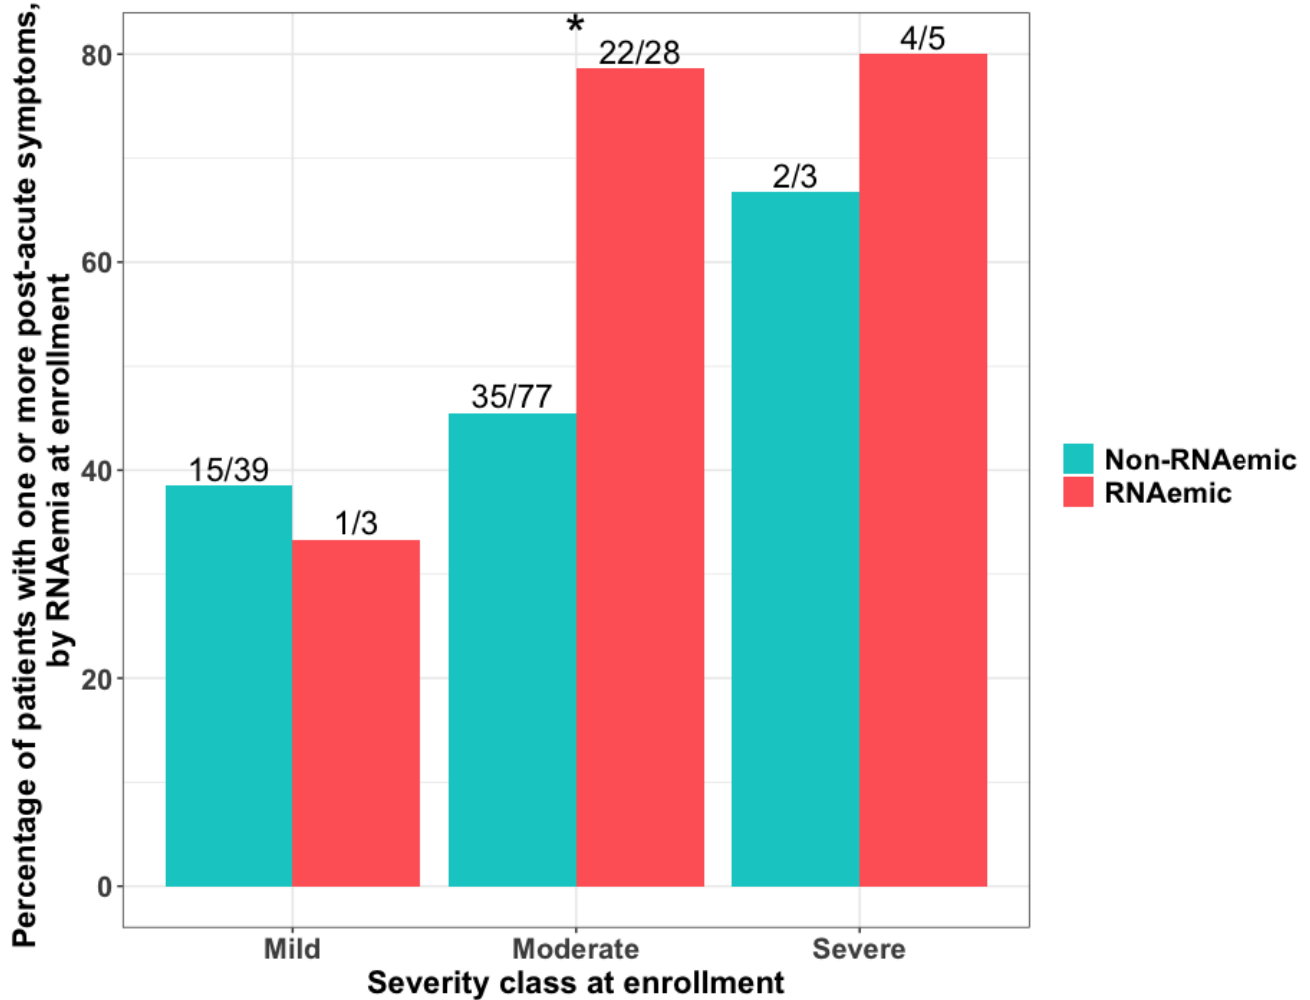

192

193 **Figure. Rate of post-acute sequelae of SARS-CoV-2 infection, by RNAemia and clinical**

194 **severity on enrollment.** Overall, 75.0% (27/36) of initially RNAemic patients had one or more

195 post-acute symptoms at follow-up, compared to 43.7% (52/119) of non-RNAemic patients

196 (difference = 31.3% [95% CI: 12.8% - 49.8%], p=0.002). Conditional on severity at enrollment

197 (mild = discharged from ED [n=42], moderate = hospitalized, requiring no more than oxygen by

198 nasal cannula [n=105], severe = hospitalized, requiring high-flow nasal cannula or mechanical

199 ventilation [n=8]), RNAemia on presentation was associated with significantly higher rates of

200 PASC for presentations of moderate severity (difference = 33.1% [95% CI, 11.8% - 54.4%],  
201 p=0.005). \* indicates p-value<0.05.
